# Supplementary material
Source: bioRxiv or medRxiv preprint supplement (https://medrxiv.org/highwire/filestream/97041/field_highwire_adjunct_files/1/2020.09.11.20187369-2.pdf)

# SuppFigure2

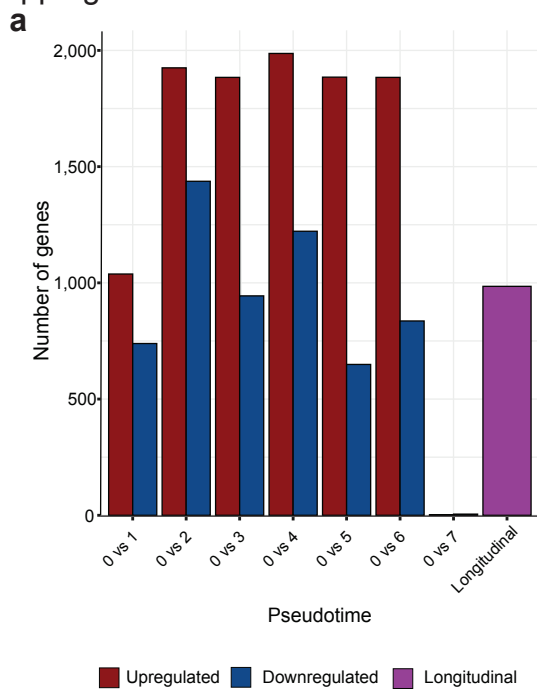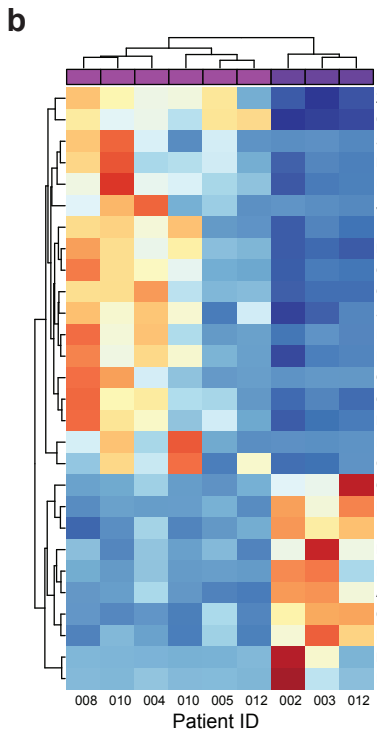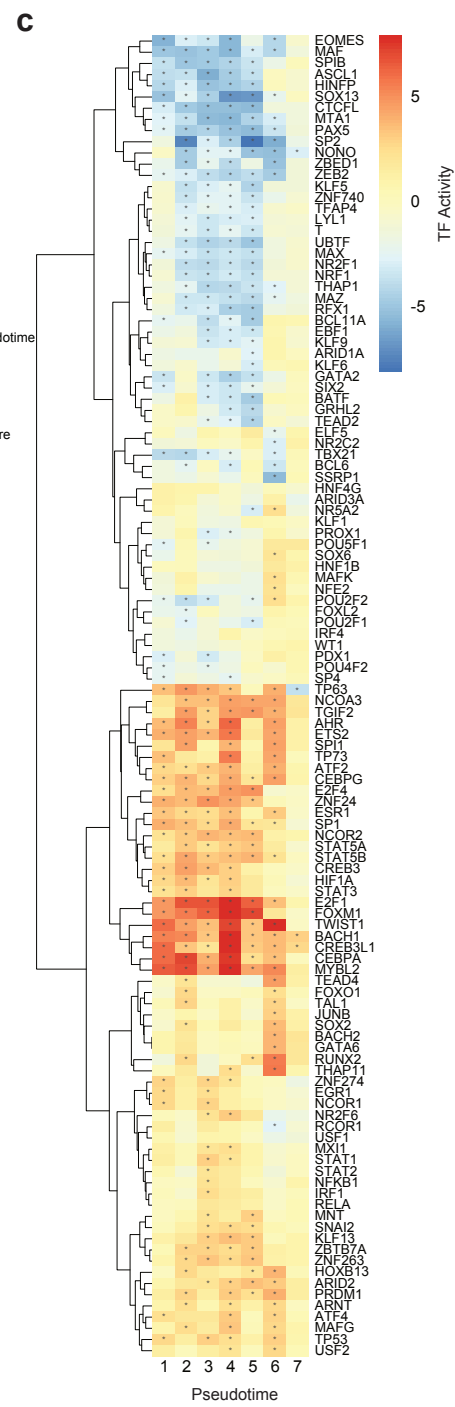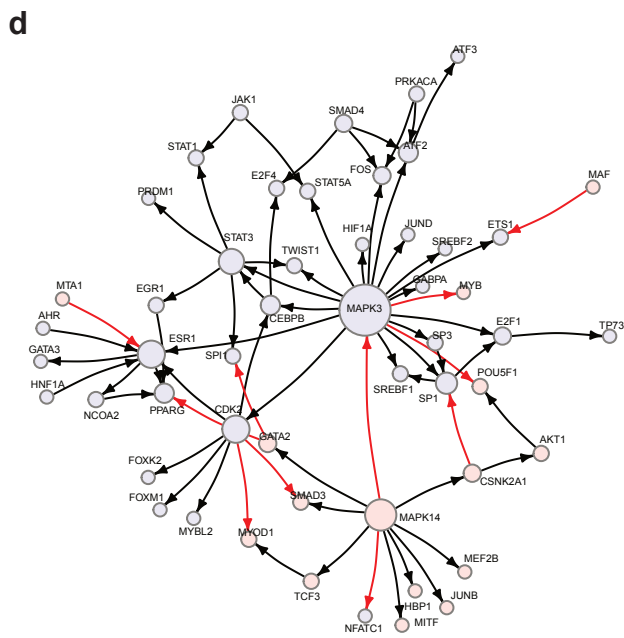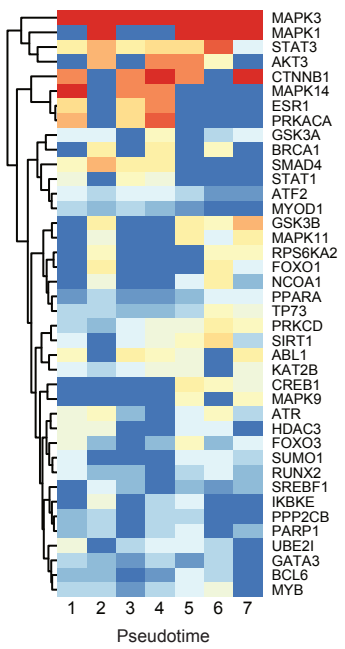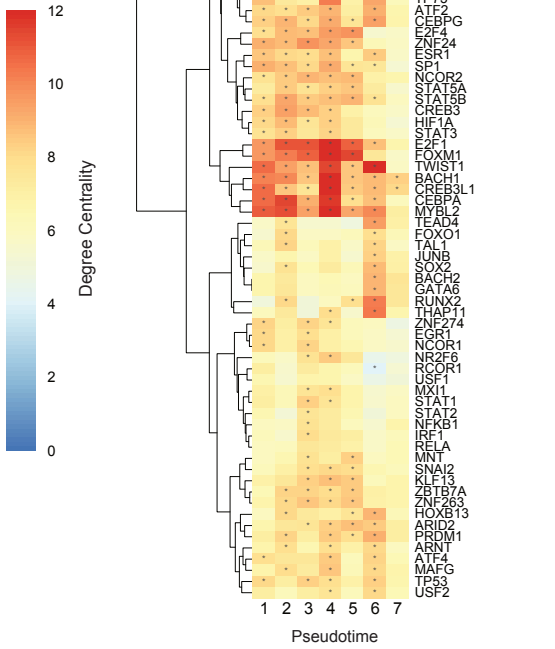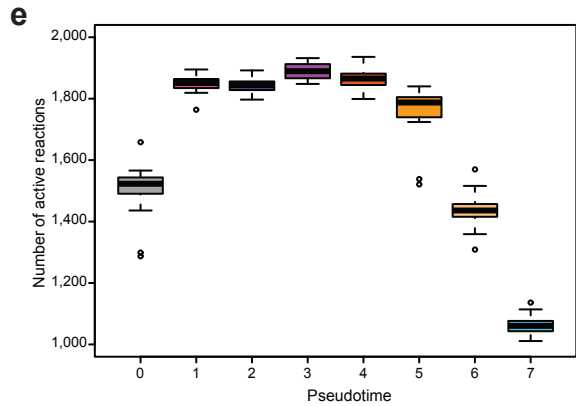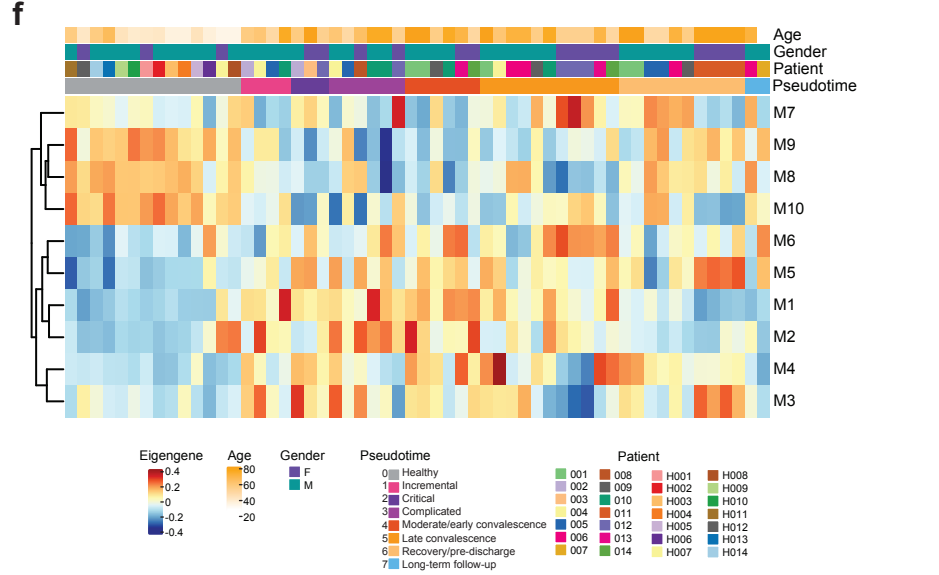

Supplement: Supplementary file [file 2020.09.11.20187369-2.pdf]
